CORRECTION

# Correction: Cannibalism, Kuru, and Mad Cows: Prion Disease As a "Choose-Your-Own-Experiment" Case Study to Simulate Scientific Inquiry in Large Lectures

The *PLOS Biology* Staff

## Notice of Republication

This article was republished on February 23, 2016 to remove or replace copyrighted material and images with privacy issues in two Supporting Information files, [S1 PowerPoint](#) and [S2 PowerPoint](#). In [S2 PowerPoint](#), the spelling of "Stanley Prusiner" was also corrected. The publisher apologizes for the errors. Please download these files again to view the correct version. The republished, corrected files are provided here for reference.

## Supporting Information

**S1 PowerPoint. Republished, corrected file.**  
(PPT)

**S2 PowerPoint. Republished, corrected file.**  
(PPT)

## Reference

1. Serrano A, Liebner J, Hines JK (2016) Cannibalism, Kuru, and Mad Cows: Prion Disease As a "Choose-Your-Own-Experiment" Case Study to Simulate Scientific Inquiry in Large Lectures. *PLoS Biol* 14(1): e1002351. doi: [10.1371/journal.pbio.1002351](https://doi.org/10.1371/journal.pbio.1002351) PMID: [26788803](https://pubmed.ncbi.nlm.nih.gov/26788803/)

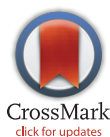

## OPEN ACCESS

**Citation:** The *PLOS Biology* Staff (2016) Correction: Cannibalism, Kuru, and Mad Cows: Prion Disease As a "Choose-Your-Own-Experiment" Case Study to Simulate Scientific Inquiry in Large Lectures. *PLoS Biol* 14(3): e1002425. doi:10.1371/journal.pbio.1002425

**Published:** March 18, 2016

**Copyright:** © 2016 The PLOS Biology Staff. This is an open access article distributed under the terms of the [Creative Commons Attribution License](https://creativecommons.org/licenses/by/4.0/), which permits unrestricted use, distribution, and reproduction in any medium, provided the original author and source are credited.
